# Supplementary material for: Soil Microbial Composition and Structure Allow Assessment of Biological Product Effectiveness and Crop Yield Prediction
Source: bioRxiv or medRxiv preprint supplement (doi:10.1101/2021.02.09.430373), 2021-02-10
Supplement: Supplementary file [file media-2.pdf]

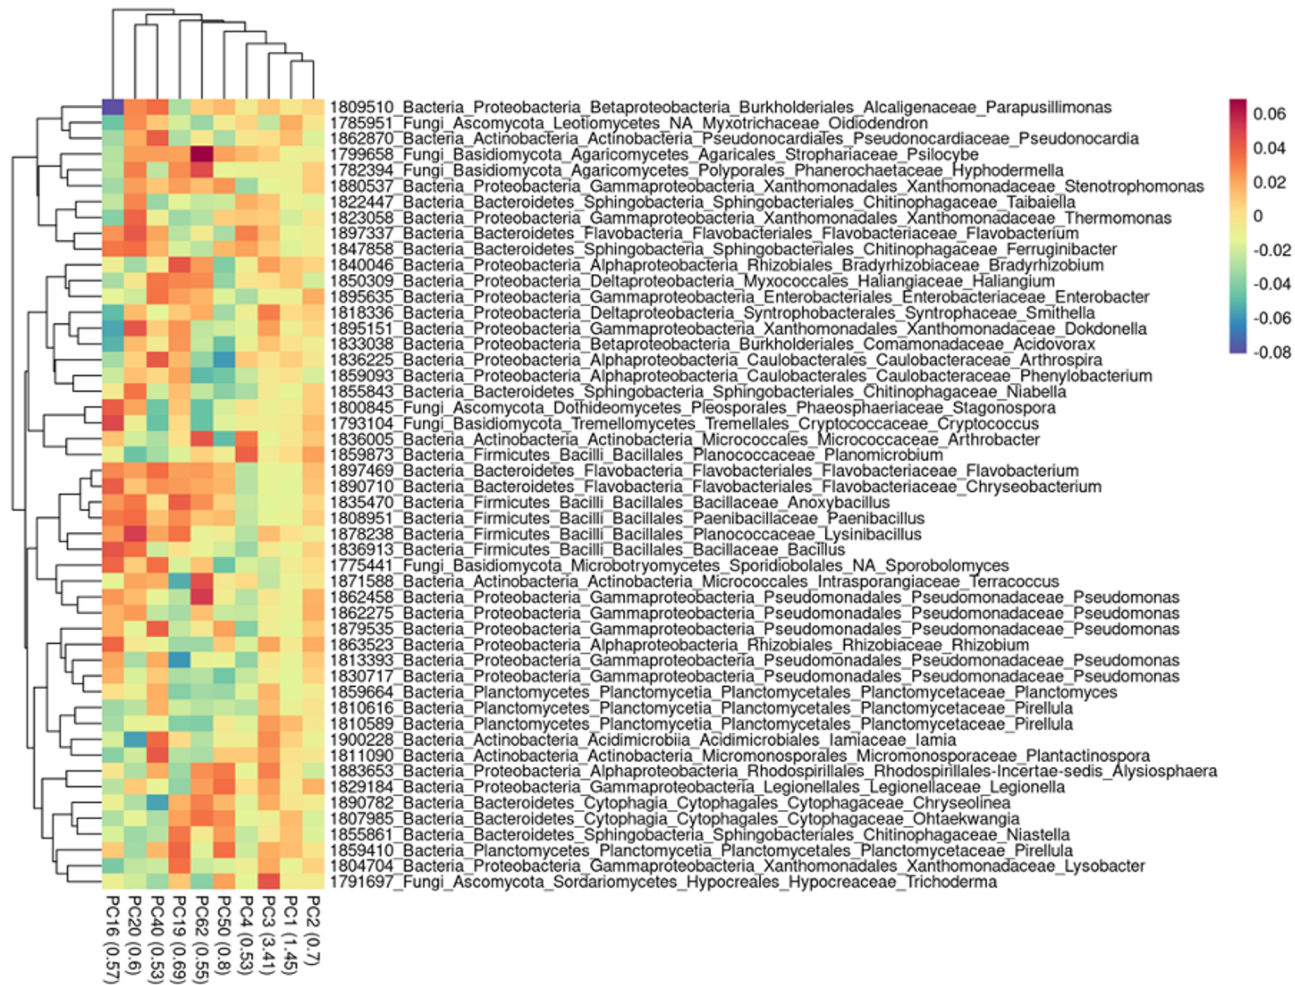

**Figure S2.** Taxonomic assignment and their relationship with yield (fold change values) of the OTUs contributing to the ten most important principal components of the beta-diversity ordination generated for the yield predictive model.
